RESEARCH ARTICLE

# Comparative effectiveness of adjuvant treatment for hepatocellular carcinoma with high risk of recurrence: A systematic review and network meta-analysis

Zha Peng<sup>1,2,3\*</sup>, Leigu Shen<sup>4\*</sup>, Yaqiong Wang<sup>2,3†</sup>, Boyu Chen<sup>3†</sup>, Zhuangrong Zhu<sup>3†</sup>, Chengyi He<sup>3†</sup>, Hai Huang<sup>3\*</sup>

**1** Department of Surgery, Dongguan Hospital of Guangzhou University of Traditional Chinese Medicine, Dongguan, China, **2** Department of General Surgery, The Second Affiliated Hospital of Guangxi Medical University, Nanning, China, **3** Department of Hepatobiliary Surgery, Wuming Hospital of Guangxi Medical University, Nanning, China, **4** Department of General Surgery, The First People's Hospital of Loudi, Loudi, China

☞ These authors contributed equally to this work.

† YW, BC, ZZ and CH also contributed equally to this work.

\* [huanghai\\_doctor@163.com](mailto:huanghai_doctor@163.com)

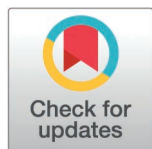

## OPEN ACCESS

**Citation:** Peng Z, Shen L, Wang Y, Chen B, Zhu Z, He C, et al. (2025) Comparative effectiveness of adjuvant treatment for hepatocellular carcinoma with high risk of recurrence: A systematic review and network meta-analysis. PLoS One 20(12): e0335457. <https://doi.org/10.1371/journal.pone.0335457>

**Editor:** Xingyu Xiong, Sichuan University, CHINA

**Received:** November 3, 2024

**Accepted:** October 10, 2025

**Published:** December 4, 2025

**Copyright:** © 2025 Peng et al. This is an open access article distributed under the terms of the [Creative Commons Attribution License](https://creativecommons.org/licenses/by/4.0/), which permits unrestricted use, distribution, and reproduction in any medium, provided the original author and source are credited.

**Data availability statement:** All relevant data are within the manuscript and its [Supporting information](#) files.

**Funding:** This work was supported by a grant from the National Natural Science Foundation of China (No. 82060478) and Guangxi

## Abstract

### Objective

To identify the most effective postoperative intervention regimen for persons with hepatocellular carcinoma (HCC) at high risk of recurrence.

### Methods

A network meta-analysis was conducted by collecting eligible studies from Medline, Embase, the Cochrane Central Register of Controlled Trials, and Web of Science databases. Pairwise and network meta-analyses were applied to pooled data on overall survival (OS) and recurrence-free survival (RFS).

### Results

35 studies involving 6,372 patients were analyzed. Pairwise meta-analysis showed higher OS (HR=0.64, 95% CI: 0.56–0.72;  $P<0.001$ ;  $I^2=70.9\%$ , random effects model) and RFS (HR=0.62, 95%CI 0.56–0.70;  $P<0.001$ ;  $I^2=60.2\%$ , random effects model) in the adjuvant intervention group compared to surgery alone. ICIs&T-KIs (SUCRA=87.3%) was significantly more effective for OS, and TKIs&TACE (SUCRA=84.1%) was significantly more effective for RFS.

### Conclusions

Reasonable postoperative intervention regimens can reduce recurrence risk and improve prognosis. ICIs&TKIs and TKIs&TACE are likely the two most effective

Science and technology planning project (2023JJA141333). The funders had no role in study design, data collection and analysis, decision to publish, or preparation of the manuscript.

**Competing interests:** The authors have declared that no competing interests exist.

adjuvant intervention regimens for individuals with HCC who are at high risk of recurrence.

## Introduction

Hepatocellular carcinoma (HCC) is the sixth most common malignant tumor and the fourth leading cause of cancer-related deaths worldwide, posing a serious threat to human health [1]. Surgery is the primary treatment for primary liver cancers [2]. However, the cumulative recurrence rate after hepatectomy is as high as 60–70% [3], and the 5-year survival rate is less than 50% [4]. Therefore, taking effective measures to reduce the postoperative recurrence of HCC is key to improving prognosis and prolonging survival.

It is generally believed that narrow resection margins (<1.0 cm) or positive resection margins, multiple tumors, presence of satellite lesions, tumor diameter >5 cm, vascular invasion, bile duct invasion, and poor tumor differentiation are high-risk factors for early recurrence after radical resection of HCC [5–8]. HCCs with these characteristics are often more aggressive, suggesting that patients have a higher recurrence rate and shorter survival time. An earlier study has found that two-thirds of patients with microvascular invasion (MVI) recur within two years [9]. With the development of multidisciplinary treatment methods for HCC, an increasing number of studies have explored effective adjuvant intervention strategies. These strategies aimed to reduce recurrence rates and prolong survival in HCC patients with high-risk recurrence factors. The adjuvant intervention strategies included transcatheter arterial chemoembolization (TACE), hepatic artery infusion chemotherapy (HAIC), radiotherapy (RT), targeted therapy, immunotherapy, and combination regimens [2,10–13]. Many studies have confirmed that adjuvant intervention for such patients can reduce postoperative recurrence rate and prolong survival [2,10–13]. However, there were relatively few head-to-head studies directly comparing the efficacy of different adjuvant intervention regimens, and the case inclusion criteria of various studies were highly heterogeneous. As a result, there is no consensus on the selection of adjuvant intervention strategies for patients with high-risk recurrence risk factors after surgery, and more reliance is placed on clinicians' empirical choices. Previous network meta-analysis [14] has compared the efficacy of adjuvant HAIC, RT, TACE, and sorafenib in HCC patients with high-risk recurrence risk factors. The results showed that adjuvant sorafenib and RT can effectively improve overall survival (OS) and disease-free survival (DFS) in patients undergoing radical resection of HCC with a high risk of recurrence. However, Xu et al.'s [14] study included only a single intervention measure and did not include a combined intervention regimen. Indeed, some clinicians are exploring various combination therapeutic regimens, such as immune checkpoint inhibitors (ICIs) plus tyrosine kinase inhibitors (TKIs) (ICIs&TKIs), and TKIs combined with TACE (TKIs&TACE), and their real-world clinical efficacy needs to be thoroughly evaluated.

This network meta-analysis employed a Bayesian framework to systematically compare the therapeutic efficacy of postoperative interventions in HCC patients

exhibiting elevated recurrence risk profiles (e.g., microvascular invasion, multifocal lesions), with the ultimate goal of establishing an evidence-based hierarchy for adjuvant therapy selection in clinical practice.

## Study design and methods

To evaluate optimal treatment strategies for HCC patients with high-risk factors to improve prognosis, we designed a network meta-analysis. The analyzed postoperative therapeutic strategies included surgery alone, monotherapy with TKIs, Aspirin, ICIs, RT, TACE or HAIC, as well as combination therapies such as ICIs&TKIs and TKIs&TACE. This network meta-analysis was reported following the PRISMA 2020 [15], and has been registered in the PROSPERO database (registration number: CRD42024586032).

## Search strategy and inclusion criteria

- 1) Literature search: we systematically searched Medline, Embase, Web of Science, and the Cochrane Central Register of Controlled Trials for all Randomized control Trials (RCTs), prospective cohort studies and retrospective studies using propensity score matching (PSM) analysis related to our study from inception to 23/09/2024. The publication language of all studies was English. Search strategies consisted of subject words and free words. The full search strategy is presented in Supplementary material [S1 File](#). In addition, we manually searched relevant reviews and references in the included literature to expand the research sample size as much as possible;
- 2) Participants: patients diagnosed with HCC who underwent radical liver resection and had at least one high-factor for recurrence. In this trial, high recurrence risk was defined as multiple tumors ( $\geq 2$ ), satellite lesions, tumor diameter  $> 5$  cm, MVI, portal vein tumor thrombosis (PVTT), narrow or positive margins.
- 3) Intervention: the postoperative adjuvant therapies identified in the literature comprised: postoperative observation only (surgery alone), Aspirin, TACE, TKIs monotherapy, ICIs, HAIC, RT and Combination therapies such as ICIs&TKIs or TKIs&TACE. Eligible studies were searched to compare the prognosis of any two interventions through head-to-head or indirect comparisons.
- 4) Outcome factors: the included studies must report at least one of the following outcomes: OS, DFS, or RFS (recurrence-free survival), along with the hazard ratio (HR) and its 95% confidence interval (CI). OS was defined as the time from radical surgery to death or the last follow-up. DFS was defined as the time from radical surgery to recurrence. RFS was defined as the time from a specific treatment or event to the disease recurrence or the occurrence of a specific outcome event. In this study, RFS and DFS were regarded as the same outcome variable. HR refers to the ratio of hazard rates between the intervention and control groups and represents the time of event occurrence in tumor studies. An intervention with a high HR was associated with poor outcomes (death or recurrence).

## Literature quality assessment and data extraction

The two authors (Z.P. and L.G.S.) independently conducted risk of bias assessments for the included RCTs in this study using the Cochrane risk-of-bias tool, version 2 (RoB 2). For non-randomized controlled studies, the Risk of Bias in Non-Randomised Studies – of Interventions (ROBINS-I) tool was employed to evaluate the risk of bias. The certainty of evidence in RCTs was assessed using the Grading of Recommendations, Assessment, Development, and Evaluations (GRADE) approach [16].

Two independent researchers (Y.Q.W and B.Y.C.) conducted data extraction after reading the full text. Discrepancies were resolved by discussion or, if necessary, by third researcher (C.Y.H.) adjudication. The extracted data included:

- 1) first author, publication time, study type, begin and end of study, crowd characteristics, treatment, and sample size;

2) patient-related information such as gender, age, number of tumors, tumor size, liver cirrhosis, MVI, hepatitis B virus or hepatitis C virus infection, Edmondson's grading, resection margin status; 3) outcome information includes HR and 95%CI of OS, DFS, or RFS after different intervention measures. HR and 95%CI were directly extracted from the article or extracted from the Kaplan-Meier curve using Engauge Digitizer software (version 4.1, M Mitchell) [17]. For studies reporting median follow-up duration and *P*-values, HRs may be calculated via validated web-based statistical platforms (<https://ebm-helper.cn/Conv/HR.html>).

## Statistical methods

We combined all direct and indirect evidence to compare the efficacy among different treatment strategies and reported them as HR for OS and RFS and the corresponding 95%CI. A combined HR < 1 indicated better efficacy in the treatment group. If the 95%CI of the combined HR did not overlap with 1, the difference was considered to be statistically significant. First, traditional pairwise meta-analyses were performed using Stata software (version 15.0), directly comparing the treatment group with the surgery alone group. A random effects model was used, and the  $I^2$  statistic and *P*-value were used to evaluate the heterogeneity. Second, the “gemtc” (version 0.8–8) and “JAGS” (version 4.3.0) in R (version 4.0.30) were used to construct the network node diagram. Third, network meta-analyses were performed using the Bayesian framework in R. Consistency and inconsistency modeling were performed on the network nodes. The difference in deviance information criteria (DIC) <5 indicates that the data basically meet the premise of consistency [17]. The convergence of iterations was evaluated using Brooks-Gelman-Rubin statistics and trace plots. In the Bayesian method, the probability of each intervention becoming the most effective treatment method was calculated using the area under the cumulative ranking curve (SUCRA). For each outcome, the larger the SUCRA value, the better the ranking of a certain therapy among various treatment methods. Bayesian *P*-value generated by the node-splitting method was used to verify the consistency of direct and indirect comparisons. Publication bias was evaluated by observing the symmetry of the funnel plots.

## Results

### Characteristics of included studies and bias assessment

A total of 3251 articles were initially retrieved. After removing duplicate articles and screening by title and abstract, 164 potentially eligible articles were reviewed in full text. Finally, 33 eligible articles were identified. In addition, two articles were supplemented by manual search. A total of 35 articles involving 6,372 patients were included in the final analysis (S2 File), comprising 11 RCTs [2,11,18–26], 7 prospective cohort studies [10,12,27–31], and 17 retrospective studies [13,32–47]. The baseline characteristics of the included studies are reported in S3 File. Thirty one of the studies used a composite endpoint combining OS with DFS or RFS. Three studies used only OS [19,25,46], and one study used only DFS as endpoint [34] (Table 1).

The GRADE assessment for OS and RFS is shown in the S4 File. The initial certainty of evidence for all RCTs was rated as moderate. Of the 35 studies included in the network meta-analysis, the majority were assessed as having moderate risk of bias, and no study had high risk of bias (S5 and S6 File).

### Pairwise meta-analysis

To determine whether postoperative adjuvant therapies improve clinical outcomes compared with surgery alone, we performed pairwise meta-analyses. Among all the included studies, 31 studies reported the original HR and 95%CI for OS (Fig 1), and 29 studies reported the original HR and 95%CI for RFS (Fig 2). The overall HR and 95% CI for OS and RFS were 0.64 (95% CI: 0.56–0.72; *P* = 0.006;  $I^2$  = 70.9%, random effects model) (Fig 1) and 0.62 (95%CI: 0.56–0.70; *P* = 0.555;  $I^2$  = 60.2%, random effects model) (Fig 2) respectively, indicating that the adjuvant group has better efficacy than the surgery alone group. Compared with the surgery alone group, TACE [0.61, (0.54–0.68)], ICIs [0.39 (0.24, 0.62)],

**Table 1. Outcome information of included studies.**

| Study      | Year | PMID     | treatment               | Control           | OS(HR,95%CI)           | RFS/DFS((HR,95%CI)     |
|------------|------|----------|-------------------------|-------------------|------------------------|------------------------|
| Xiang [27] | 2024 | 37812183 | TACE                    | Hepatectomy alone | 0.527(0.2896,0.959)    | 0.408(0.2216,0.7513)   |
| Peng [26]  | 2024 | 38568599 | Sorafenib+TACE          | Sorafenib         | 0.57 (0.36–0.91)       | 0.57 (0.39–0.83)       |
| Bai [2]    | 2024 | 38488934 | RT                      | TACE              | 0.73 (0.22–2.37)       | 0.78 (0.3–2.0)         |
| Wang [32]  | 2023 | 38242982 | sintilimab              | Hepatectomy alone | 0.505 (0.254–1.006)    | 0.534 (0.360–0.792)    |
| Lu [19]    | 2023 | 37810112 | Aspirin                 | Hepatectomy alone | 0.664(0.419–1.052)     | NR                     |
| Luo [47]   | 2023 | 36905230 | TACE                    | Hepatectomy alone | 0.43 (0.18–0.99)       | 0.54 (0.31–0.92)       |
| Long [10]  | 2023 | 36634853 | RT                      | Hepatectomy alone | 0.80 (0.26–2.43)       | 0.57 (0.28–1.15)       |
| Li [12]    | 2023 | 37452107 | ICIs alone or with TKIs | Hepatectomy alone | 0.31 (0.17–0.59)       | 0.52 (0.35–0.76)       |
| Li [32]    | 2023 | 37359534 | ICIs + TKIs             | Hepatectomy alone | 0.32 (0.12–0.86)       | 0.47 (0.23–0.96)       |
| Bai [33]   | 2023 | 37029989 | TACE                    | Hepatectomy alone | 0.63 (0.33–1.21)       | 0.66 (0.38–1.16)       |
| Li [11]    | 2023 | 36525610 | HAIC                    | Hepatectomy alone | 0.64 (0.36–1.14)       | 0.59 (0.43–0.81)       |
| Gou [35]   | 2022 | 35643251 | RT                      | Hepatectomy alone | 0.72 (0.5429–0.9657)   | 0.6434 (0.458–0.9039)  |
| Lin [34]   | 2022 | 35300207 | TKIs+TACE               | TACE              | NR                     | 0.67(0.38–1.16)        |
| Qiu [13]   | 2022 | 35795039 | TACE                    | Hepatectomy alone | 0.5541 (0.3261–0.9413) | 0.4579 (0.2724–0.7697) |
| Wang [37]  | 2021 | 33455865 | TACE                    | Hepatectomy alone | 0.4762 (0.3061–0.7408) | 0.1474 (0.0471–0.4611) |
| Li [38]    | 2021 | 34631511 | sorafenib               | Hepatectomy alone | 0.7647 (0.5984–0.9772) | 0.7857 (0.3463–1.7828) |
| Wang [36]  | 2021 | 32440804 | TACE                    | Hepatectomy alone | 0.7506 (0.5178–1.0882) | 0.7468 (0.5947–0.9378) |
| Huang [40] | 2020 | 33061610 | TACE                    | Hepatectomy alone | 0.5294 (0.334–0.8391)  | 0.25 (0.0958–0.6521)   |
| Rong [20]  | 2020 | 33223759 | RT                      | Hepatectomy alone | 0.85 (0.48–1.50)       | 0.62 (0.33–1.14)       |
| Wang [28]  | 2020 | 32611327 | RT                      | Hepatectomy alone | 0.6675 (0.5069–0.879)  | 0.2456 (0.0902–0.6686) |
| Wang [39]  | 2020 | 32547217 | TACE                    | Hepatectomy alone | 0.625 (0.4313–0.9056)  | 0.884 (0.8096–0.9653)  |
| Zhang [41] | 2019 | 30767178 | TACE                    | Hepatectomy alone | 0.6272 (0.4565–0.8617) | 0.7702 (0.6268–0.9464) |
| Zhang [42] | 2019 | 31153833 | sorafenib               | Hepatectomy alone | 0.806 (0.6891–0.9428)  | 0.4688 (0.2985–0.7361) |
| Wang [44]  | 2019 | 30863091 | RT                      | TACE              | 0.62 (0.26–1.49)       | 0.47 (0.27–0.83)       |
| Sun [21]   | 2019 | 31176205 | RT                      | Hepatectomy alone | 0.444(0.243–0.813)     | 0.358(0.197–0.652)     |
| Qi [29]    | 2019 | 30103903 | TACE                    | Hepatectomy alone | 0.60 (0.13–2.76)       | 0.99 (0.53–1.86)       |
| Wang [43]  | 2019 | 30249510 | TACE                    | Hepatectomy alone | 0.519 (0.323–0.832)    | 0.655 (0.450–0.954)    |
| Wei [22]   | 2018 | 30305149 | TACE                    | Hepatectomy alone | 0.68 (0.48–0.97)       | 0.70 (0.52–0.95)       |
| Wang [23]  | 2018 | 29420221 | TACE                    | Hepatectomy alone | 0.59 (0.36–0.97)       | 0.68 (0.49–0.93)       |
| Li [45]    | 2017 | 28032575 | TACE                    | Hepatectomy alone | 0.66 (0.35–1.23)       | 0.78 (0.46–1.34)       |
| Hsiao [30] | 2017 | 28728985 | HAIC                    | Hepatectomy alone | 1.0089 (0.9533–1.0676) | 1.0771 (0.3182–3.6459) |
| Xia [31]   | 2016 | 27340354 | sorafenib               | Hepatectomy alone | 0.72 (0.5511–0.9406)   | 0.8333 (0.704–0.9863)  |
| Li [46]    | 2015 | 24972992 | TACE                    | Hepatectomy alone | 0.4286 (0.1967–0.9339) | NR                     |
| Zhong [24] | 2009 | 19408012 | TACE                    | Hepatectomy alone | 0.72 (0.47–1.10)       | 0.55 (0.37–0.82)       |
| Peng [25]  | 2009 | 19285298 | TACE                    | Hepatectomy alone | 0.61(0.30–0.98)        | NR                     |

OS, overall survival; DFS, disease-free survival; RFS, recurrence-free survival; HR, hazard ratio; CI, confidence intervals; TACE, transhepatic arterial chemoembolization; HAIC, hepatic artery infusion chemotherapy; RT, radiotherapy; ICIs, immune checkpoint inhibitors; TKIs, Tyrosine kinase inhibitors; ICIs&TKIs, ICIs combined with TKIs; TKIs&TACE, TKIs combined with TACE; MVI, microvascular invasion; PVTT, portal vein tumor thrombosis; NR, not reported.

<https://doi.org/10.1371/journal.pone.0335457.t001>

RT [0.68 (0.57, 0.81)], ICIs&TKIs [0.32 (0.12, 0.86)] and TKIs [0.78 (0.69, 0.88)] was associated with prolonged survival (Fig 1). The point estimate for OS suggested a potential benefit for postoperative aspirin [0.66, (0.42, 1.05)] or HAIC [0.88, (0.59, 1.33)] compared to surgery alone; however, the confidence intervals were wide and the result was not statistically significant (Fig 1).



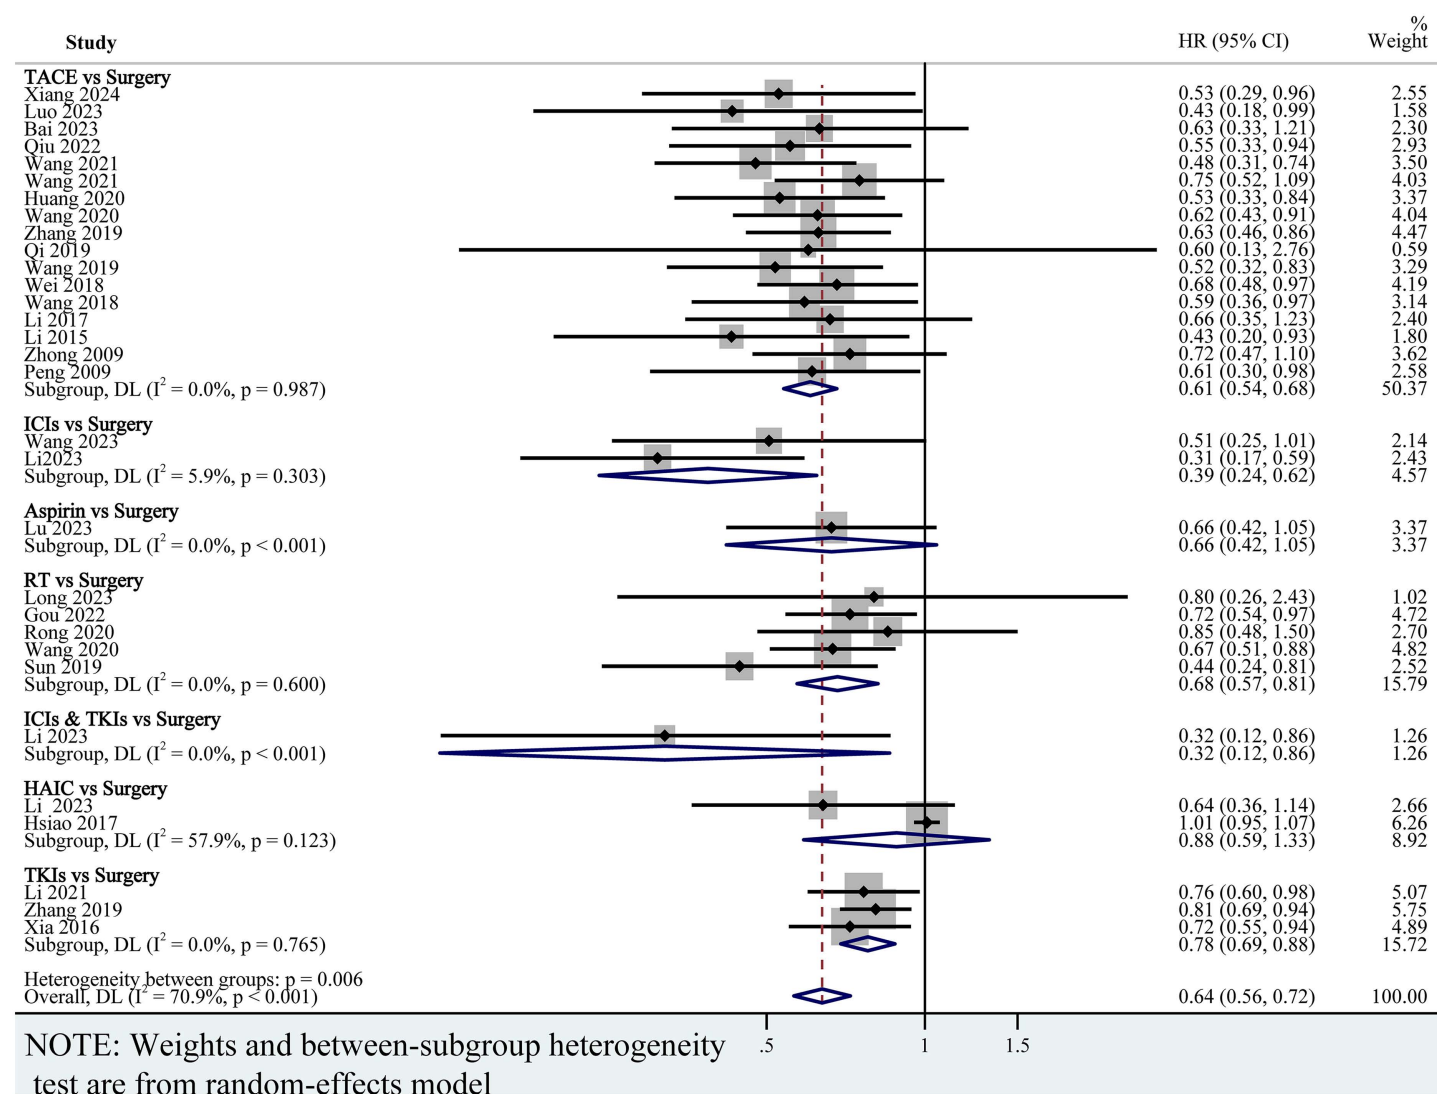

**Fig 1. Forest plot of OS for pairwise meta-analyses.** TACE, transhepatic arterial chemoembolization; HAIC, hepatic artery infusion chemotherapy; RT, radiotherapy; ICIs, immune checkpoint inhibitors; TKIs, Tyrosine kinase inhibitors; ICIs&TKIs, ICIs combined with TKIs.

<https://doi.org/10.1371/journal.pone.0335457.g001>

For RFS, the pooled HRs strongly support that postoperative adjuvant administration of TACE [0.66 (0.57, 0.76)], ICIs [0.53 (0.40, 0.69)], RT [0.52 (0.38, 0.70)], HAIC [0.61 (0.45, 0.83)] and ICIs&TKIs [0.47 (0.23, 0.96)] can significantly reduce the recurrence risk of patients (Fig 2). Although adjuvant therapy with TKIs postoperatively was associated with a numerical improvement in RFS compared to the surgery-alone group [0.68 (0.45, 1.03)], the effect did not reach statistical significance (Fig 2).

## Network meta-analysis

We constructed network diagrams for OS and RFS based on the included literatures (Fig 3). These diagrams clearly demonstrate the evidence structure: surgery alone is the dominant comparator, with substantial direct evidence available for comparing it against interventions like postoperative TACE, RT, ICIs, HAIC, and TKIs. This abundance of direct

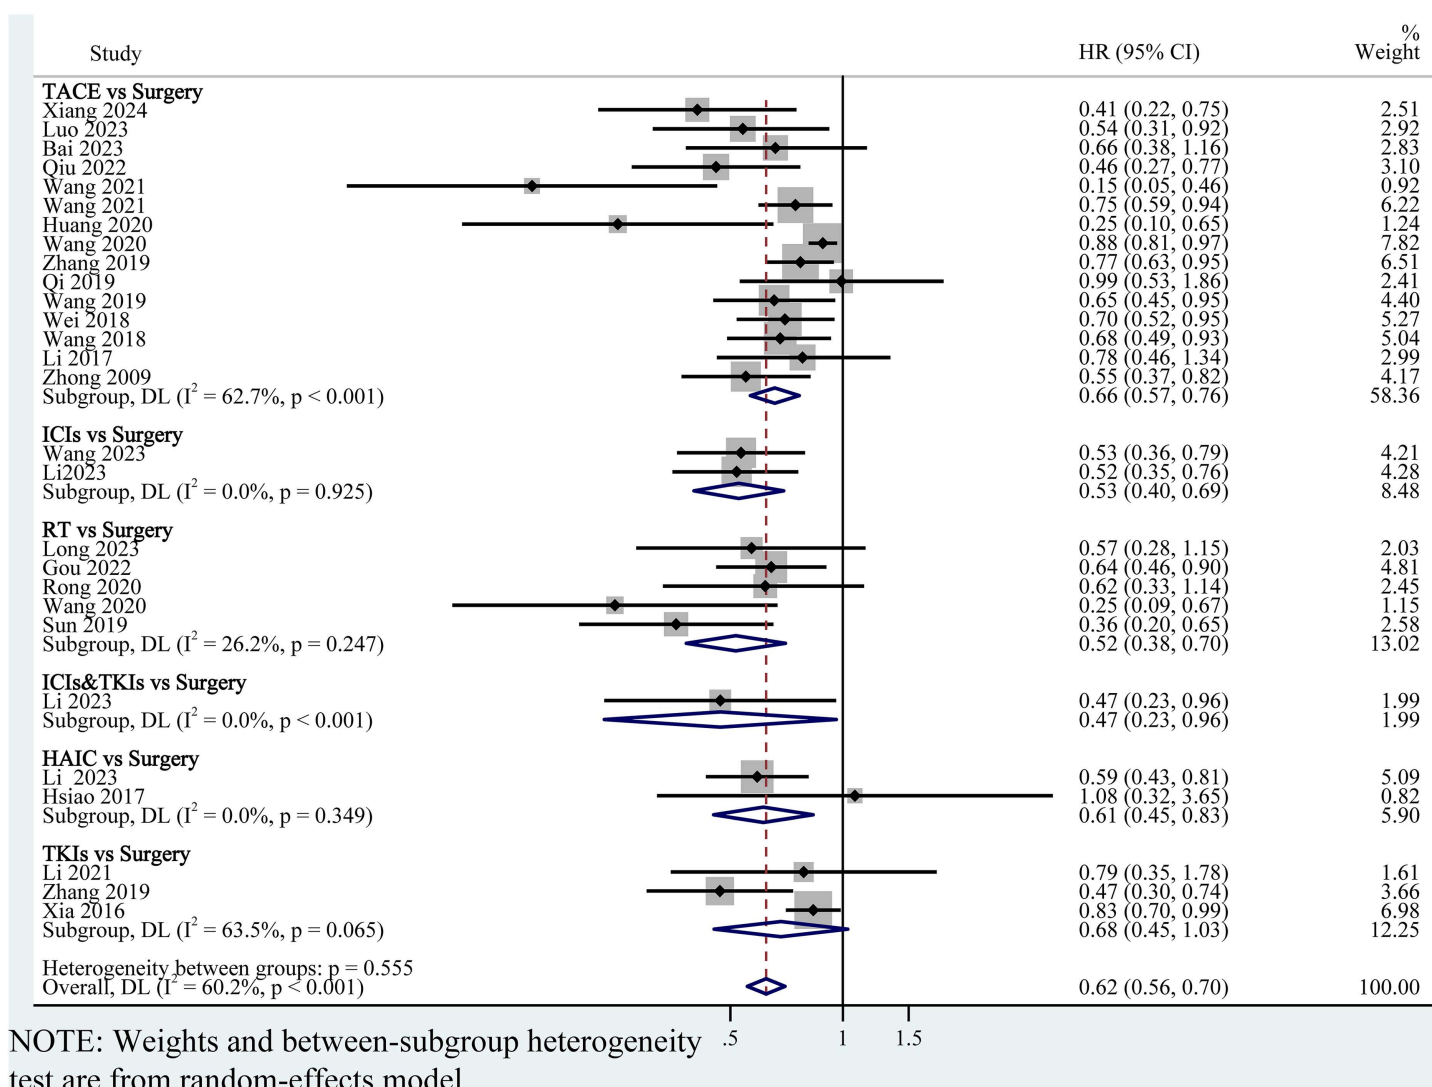

**Fig 2. Forest plot of RFS for pairwise meta-analyses.** TACE, transhepatic arterial chemoembolization; HAIC, hepatic artery infusion chemotherapy; RT, radiotherapy; ICIs, immune checkpoint inhibitors; TKIs, Tyrosine kinase inhibitors; ICIs&TKIs, ICIs combined with TKIs.

<https://doi.org/10.1371/journal.pone.0335457.g002>

head-to-head comparisons enables robust pairwise effect assessment for most of these interventions. However, direct evidence for pairwise comparisons not involving surgery alone (such as RT vs. TACE) is sparse. Additionally, as showed in Panel A (Fig 3), no direct comparison trials were identified between the combination therapy TKIs&TACE and HAIC alone. Therefore, while our analysis leverages the extensive direct evidence elsewhere, the estimation of the relative effect between TKIs&TACE and HAIC alone in OS will rely exclusively on indirect evidence derived from the network.

The network meta-analysis evaluating OS and RFS in HCC patients at high recurrence risk was conducted. The effects of postoperative interventions were quantified using HRs with 95% CIs. For OS (Fig 4), results showed that efficacy of postoperative ICIs, ICIs&TKIs, RT, TACE, TKIs or TKIs&TACE was better than that of HAIC. The efficacy of adjuvant ICIs was better than that of TKIs. The efficacy of TACE or TKIs&TACE was better than that of TKIs, and there was no significant difference in the efficacy between postoperative TACE and ICIs.

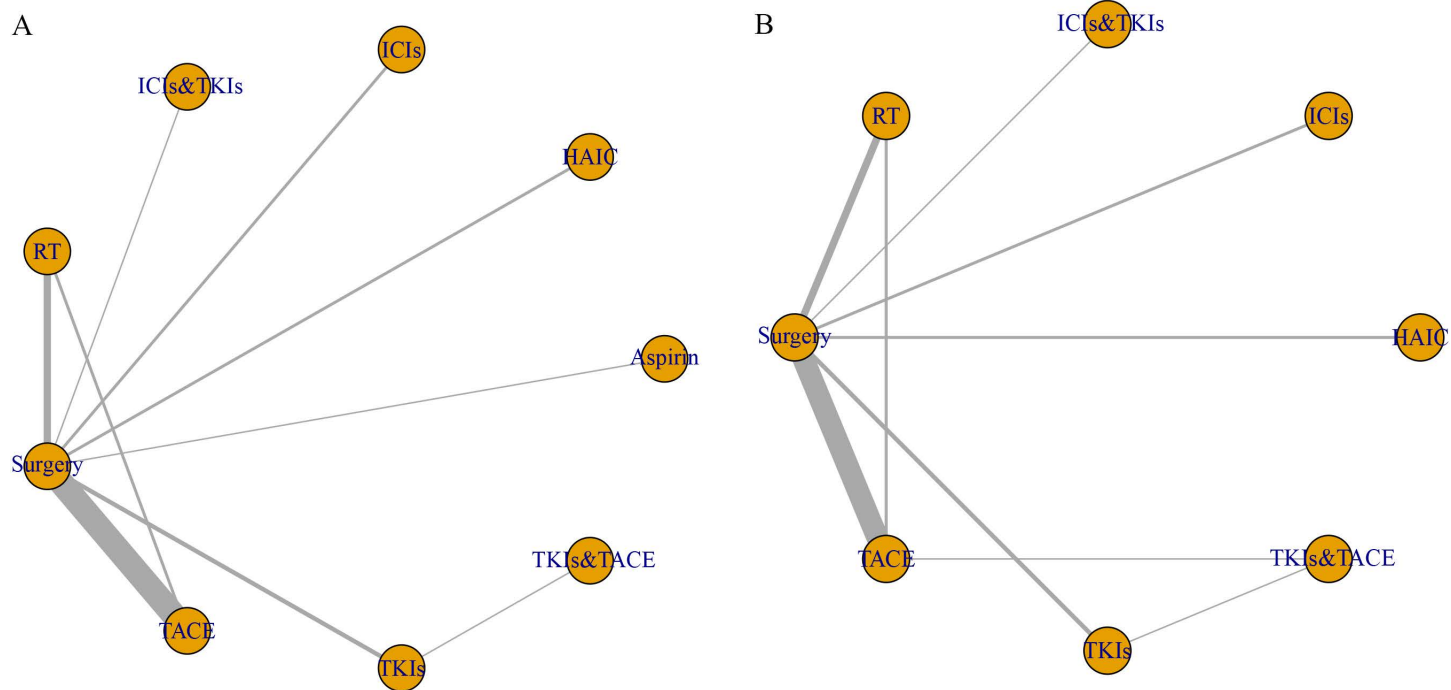

**Fig 3. Network diagram of eligible comparisons for OS (A) and RFS (B).** Each circular node represents a variety of interventions. The width of lines between the nodes is proportional to the number of trials performing head-to-head comparisons. TACE, transhepatic arterial chemoembolization; HAIC, hepatic artery infusion chemotherapy; RT, radiotherapy; ICIs, immune checkpoint inhibitors; TKIs, Tyrosine kinase inhibitors; ICI&TKIs, ICIs combined with TKIs; TKIs&TACE, TKIs combined with TACE.

<https://doi.org/10.1371/journal.pone.0335457.g003>

For RFS (Fig 4), although the efficacy of TKIs&TACE was better than that of TKIs alone, there was no significant difference in efficacy compared with TACE alone. The efficacy of postoperative RT was better than that of TACE, but there was no significant difference in efficacy compared with other adjuvant treatment regimens. In addition, there was no significant difference in efficacy among HAIC, ICIs, ICI&TKIs, and TKIs.

The surface under the cumulative ranking curve (SUCRA) values for OS and RFS was presented in Fig 5. The SUCRA analysis results indicated that for OS (Fig 5A), the most effective intervention was ICI&TKIs, followed by ICIs, TKIs&TACE, TACE, RT, Aspirin, TKIs, HAIC and surgery alone. For RFS (Fig 5B), the most effective intervention was TKIs&TACE, followed by RT, ICI&TKIs, ICIs, HAIC, TACE, TKIs and surgery alone.

The consistency of the model was evaluated using density trace plots (S7 and S8 Files) and Brooks-Gelman-Rubin diagnostic plots (S9 and S10 Files). Single chain fluctuations were not visible to the naked eye, and the density map was normally distributed, suggesting an excellent convergence for these models. For OS and RFS, heterogeneity tests showed that the  $I^2$  of most studies was lower than 50%, suggesting small heterogeneity (S11 and S12 Files). The Bayesian  $P$ -value showed no obvious inconsistency (S13 and S14 Files). The funnel plot, which was used to assess publication bias, showed general symmetry among the included studies, indicating a minimal risk of publication bias (S15 File).

## Discussion

HCC is a highly malignant tumor characterized by a significant postoperative recurrence rate, primarily due to the presence of numerous high-risk recurrence factors among patients. Despite recent advancements in surgical techniques, perioperative care, and patient selection, which have collectively reduced surgical complications and mortality, the



|         |                   |                   |                   |                   |                   |                   |                   |                   |
|---------|-------------------|-------------------|-------------------|-------------------|-------------------|-------------------|-------------------|-------------------|
| Aspirin | 1.49 (0.91, 2.46) | 0.59 (0.3, 1.18)  | 0.49 (0.16, 1.44) | 0.99 (0.6, 1.67)  | 1.51 (0.95, 2.44) | 0.92 (0.57, 1.5)  | 1.16 (0.72, 1.92) | 0.67 (0.33, 1.35) |
|         | HAIC              | 0.4 (0.24, 0.66)  | 0.32 (0.12, 0.91) | 0.67 (0.53, 0.85) | 1.01 (0.9, 1.2)   | 0.62 (0.52, 0.75) | 0.78 (0.65, 0.98) | 0.45 (0.27, 0.77) |
|         |                   | 1.21 (0.67, 2.26) | ICIs              | 0.82 (0.27, 2.51) | 1.68 (1, 2.78)    | 2.55 (1.57, 4.09) | 1.56 (0.95, 2.53) | 1.98 (1.19, 3.23) |
|         |                   | 1.35 (0.53, 3.51) | 1.11 (0.45, 2.76) | ICIs&TKIs         | 2.07 (0.72, 5.63) | 3.14 (1.13, 8.47) | 1.91 (0.68, 5.19) | 2.44 (0.85, 6.65) |
|         |                   | 1.32 (0.79, 2.36) | 1.09 (0.68, 1.8)  | 0.98 (0.42, 2.34) | RT                | 1.51 (1.26, 1.83) | 0.92 (0.75, 1.14) | 1.17 (0.93, 1.49) |
|         |                   | 0.64 (0.4, 1.03)  | 0.52 (0.35, 0.78) | 0.47 (0.21, 1.06) | 0.48 (0.36, 0.63) | Surgery           | 0.61 (0.54, 0.69) | 0.77 (0.67, 0.89) |
|         |                   | 0.93 (0.59, 1.6)  | 0.77 (0.52, 1.2)  | 0.7 (0.3, 1.61)   | 0.71 (0.53, 0.95) | 1.47 (1.28, 1.75) | TACE              | 1.27 (1.06, 1.53) |
|         |                   | 0.88 (0.52, 1.61) | 0.73 (0.45, 1.22) | 0.66 (0.28, 1.58) | 0.67 (0.44, 1.01) | 1.39 (1.04, 1.93) | 0.95 (0.68, 1.31) | TKIs              |
|         |                   | 0.88 (0.52, 1.61) | 1.24 (0.68, 2.31) | 1.11 (0.44, 2.87) | 1.13 (0.66, 1.94) | 2.36 (1.49, 3.83) | 1.6 (1, 2.56)     | 1.69 (1.09, 2.64) |
|         |                   |                   |                   |                   |                   |                   |                   | TKIs&TACE         |

**Fig 4. Pooled estimates of the network meta-analysis for OS and RFS.** Values in each cell show HR (95%CI) for the comparison between the column defining intervention and the row defining intervention for OS (above the diagonal) and RFS (below the diagonal). HR less than 1 favor the treatment in the corresponding column. Orange indicates significant difference. TACE = transhepatic arterial chemoembolization, HAIC = hepatic artery infusion chemotherapy, RT = radiotherapy, ICIs = immune checkpoint inhibitors, TKIs = Tyrosine kinase inhibitors, ICIs&TKIs = ICIs combined with TKIs, TKIs&TACE = TKIs combined with TACE.

<https://doi.org/10.1371/journal.pone.0335457.g004>

persistent high recurrence rate poses a considerable challenge [1]. This underscores the need for effective adjuvant treatment strategies. This network meta-analysis systematically evaluates the clinical efficacy of various adjuvant interventions following radical resection of HCC, providing valuable insights for clinical decision-making and future research endeavors.

The purpose of postoperative adjuvant therapy is to target tumor cells released during surgery, as well as microscopic lesions that may go undetected by imaging techniques [48]. Patients with HCC who have high-risk recurrence factors often present with more invasive primary lesions, increasing the possibility of residual tumor. Our findings indicated that ICIs&TKIs (SUCRA=87.33%) was the best regimen for OS and performs significantly better than HAIC (SUCRA=8.02%) and surgery alone (SUCRA=6.47%), with clinical significance. We also found that ICIs&TKIs have shown an overwhelming advantage in improving the survival prognosis of patients with high-risk recurrence factors when compared with adjuvant TACE, RT and Aspirin. A single-arm study has demonstrated that combination of TKIs and anti-PD-1 antibodies achieved a surgical conversion rate of 55.4% in advanced HCC, with a median OS of 23.9 months [49]. For HCC patients with high-risk recurrent factors, ICIs&TKIs can increase the 3-year OS rate by 36.7% [32]. The above research findings highlighted its potent antitumor efficacy. This may be attributed to the synergistic anti-tumor effects of the combined regimens, which is more beneficial for clearing the residual micrometastatic lesions in the remaining liver, thus achieving satisfactory effects of prolonging long-term survival. Furthermore, we also found that the use of ICIs alone (SUCRA=85.82%) has also shown excellent efficacy, suggesting their potential as a valuable standalone option in postoperative adjuvant therapy following liver resection. Regarding RFS, we found that TKIs&TACE was the best regimen (SUCRA value 84.08%), with a significantly higher SUCRA value compared to RT (75.32%), ICIs&TKIs (69.34%), ICIs (64.55%), HAIC (43.17%), TACE (33.97%), TKIs (28.39%) and surgery alone (1.19%). Great efforts have been made to explore effective

A

| Treatment | SUCRA(%) |
|-----------|----------|
| ICIs&TKIs | 87.33    |
| ICIs      | 85.82    |
| TKIs&TACE | 78.87    |
| TACE      | 58.03    |
| RT        | 48.12    |
| Aspirin   | 47.12    |
| TKIs      | 30.22    |
| HAIC      | 8.02     |
| Surgery   | 6.47     |

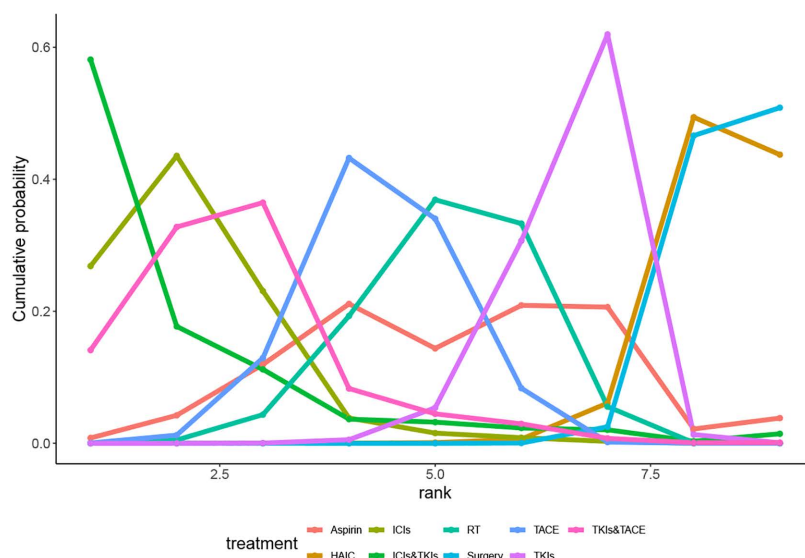

B

| Treatment | SUCRA(%) |
|-----------|----------|
| TKIs&TACE | 84.08    |
| RT        | 75.32    |
| ICIs&TKIs | 69.34    |
| ICIs      | 64.55    |
| HAIC      | 43.17    |
| TACE      | 33.97    |
| TKIs      | 28.39    |
| Surgery   | 1.19     |

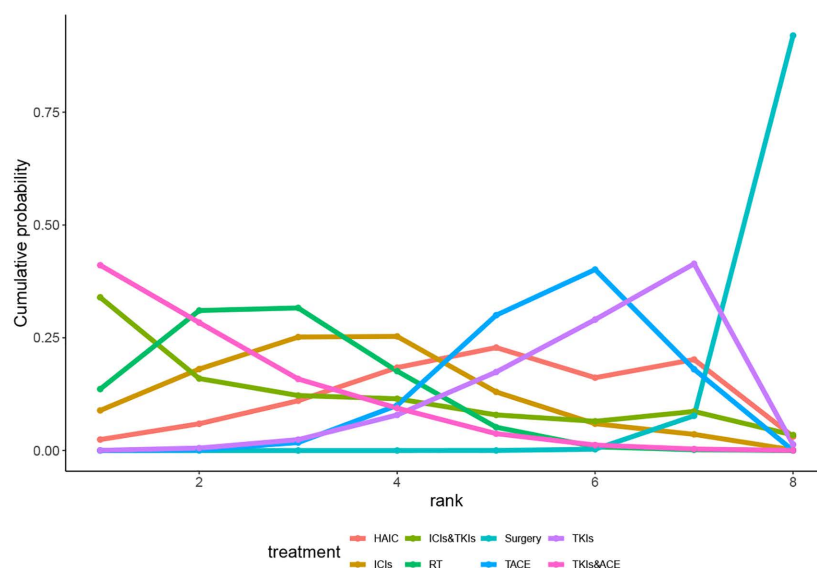

**Fig 5. Surface under the cumulative ranking curve (SUCRA) values for OS (A) and RFS (B).** TACE=transhepatic arterial chemoembolization; HAIC=hepatic artery infusion chemotherapy; RT=radiotherapy; ICIs=immune checkpoint inhibitors; TKIs=Tyrosine kinase inhibitors; ICIs&TKIs=ICIs combined with TKIs; TKIs&TACE=TKIs combined with TACE.

<https://doi.org/10.1371/journal.pone.0335457.g005>

preventive interventions to reduce the HCC recurrence after hepatectomy, among which TACE and Lenvatinib were two widely used therapies [50]. TACE, as a local treatment, mainly affected the blood vessels of the microvascular invasion lesions in the surgical area, while the systemic treatment of Lenvatinib mainly inhibited tumor cell proliferation and angiogenesis. Of note, TACE was often powerless for tumor cells shed by intraoperative manipulation and residual tumor cells in the cut edge or blood vessels. Therefore, the combination of the two may show the effect of “1+1>2” [51].

Postoperative TACE treatment is the most commonly used adjuvant treatment following surgery. However, there is ongoing debate regarding its effectiveness in reducing recurrence and prolonging survival in HCC patients [52].

Postoperative TACE may induce a hypoxic environment that stimulates the expression of hypoxia-inducible factor-1 $\alpha$  and vascular endothelial growth factor (VEGF), activating related signaling pathways, promoting angiogenesis, and fostering a microenvironment that supports tumor growth, potentially leading to recurrence, progression, and metastasis [53,54]. Some studies have reported that postoperative TACE showed no significant benefit for HCC patients [55], while others indicated that it may achieve higher OS and RFS rates compared to simple surgical resection, supporting its role as an effective adjuvant treatment following hepatectomy [29,43]. For patients at high risk of recurrence, the direct antitumor effects of postoperative TACE appeared to outweigh its potential tumor-promoting effects, demonstrating considerable efficacy. However, in patients without MVI, with tumors  $\leq 5$  cm in diameter, or with preoperative alpha-fetoprotein (AFP) levels  $< 400$  ng/ml, TACE may not improve long-term survival rates and could even exacerbate the risk of postoperative recurrence [56,57]. Our study revealed that TACE monotherapy has no significant advantage in prolonging OS or RFS for HCC patients with high-risk recurrence factors. However, indirect comparisons suggested a potential OS and RFS benefit with TKIs&TACE versus monotherapies, though this could not be verified through direct head-to-head trials due to limited evidence connections in the network.

Traditionally, RT has been avoided in the treatment of HCC due to concerns about the risk of radiation-induced liver disease and its limited efficacy [58]. However, advancements in technology have led to the development of sophisticated external RT techniques, such as three-dimensional conformal RT and intensity-modulated RT, which allowed for precise delivery of tumoricidal radiation dose to the tumor bed while sparing significant amounts of normal liver tissue [59]. Recent studies have also indicated that RT can remodel the tumor immune microenvironment through various mechanisms, including the modulation of exosomes and stromal cells, thereby enhancing its antitumor effects [60,61]. A series of studies have shown that RT increased effectiveness in HCC patients across all stages [62–65]. For patients with high-risk recurrence factors such as narrow or positive surgical margins [10,35], portal vein invasion [21], and MVI [28], postoperative RT has been shown to improve the prognosis. One study that compared the adjuvant treatment outcomes of RT versus TACE in HCC patients with positive MVI found that RT significantly outperformed TACE in terms of both OS and RFS [44]. Our network meta-analysis suggests that, compared to TACE, RT can prolong RFS in patients with high-risk recurrence factors, but no significant difference was observed in OS. Therefore, a comprehensive assessment of the relative advantages and disadvantages of RT compared to other postoperative adjuvant treatment strategies should rely on real-world studies with larger sample sizes.

TKIs such as sorafenib and lenvatinib were initially developed for the treatment of advanced HCC. Their mechanisms of action involved direct inhibition of tumor growth by targeting the RAF/MEK/ERK signaling pathway, as well as indirect inhibition of tumor cell proliferation by blocking vascular endothelial growth factor receptor (VEGFR) and platelet-derived growth factor receptor (PDGFR) pathways, which were crucial for tumor neovascularization [66]. Multiple RCTs have demonstrated that both sorafenib and lenvatinib significantly prolong OS and progression-free survival (PFS) in advanced HCC [67,68]. In terms of postoperative adjuvant therapy, multiple retrospective studies and small clinical trials have indicated that sorafenib as an adjuvant treatment can reduce recurrence risk and enhance long-term prognosis [31,69]. Nevertheless, the STORM trial, a rigorously designed randomized clinical trial, failed to provide conclusive evidence for the definitive efficacy of sorafenib as an adjuvant therapy [70]. In contrast, ICIs present distinct advantages as an adjuvant strategy following hepatectomy. ICIs not only reduced the risk of early recurrence by targeting hidden residual lesions but also activated the immune system to lower the incidence of new HCC cases [71,72]. Our network meta-analysis showed that postoperative administration of TKIs, ICIs, or combination therapy enhances both OS and RFS in liver cancer patients with high-risk recurrence factors compared to surgery alone.

Unlike systemic chemotherapy, HAIC can directly deliver drugs to the tumor-feeding artery to increase the local concentration, thereby achieving better inhibition of tumor recurrence and milder adverse reactions [73]. Numerous studies have observed that HAIC can reduce recurrence risk after hepatectomy in HCC patients with macroscopic PVTT, suggesting that patients with high-grade vascular invasion may be particularly suitable candidates for adjuvant HAIC [74,75].

A meta-analysis indicated that adjuvant HAIC improves PFS and OS after hepatectomy, especially for tumors larger than 7 cm [76]. A recent RCT demonstrated that while HAIC improved DFS in HCC patients with MVI, it did not significantly impact OS [11]. Moreover, a multicenter, open-label RCT [77] demonstrated that FOLFOX-HAIC significantly improved OS versus TACE in unresectable large HCC (tumor diameter  $\geq 7$  cm). Our network meta-analysis indicates that, for HCC patients with high-risk recurrence factors, HAIC does not significantly improve OS or RFS. This lack of impact may be attributable to the broad range of identified high-risk factors and associated heterogeneity. Assessing HAIC's efficacy for these patients would require more real-world data.

This study has several limitations. First, the current literature for network meta-analysis includes prospective and retrospective cohort studies as well as RCTs, which are susceptible to various biases. Second, the stringent inclusion criteria resulted in a limited number of eligible studies for this meta-analysis. Notably, certain intervention comparisons (e.g., ICIs&TKIs vs. surgery, TKIs&TACE vs. TACE) were informed by single-study evidence, which may compromise the robustness of the corresponding conclusions. Third, most sources for this study are from mainland China, with one from Taiwan. Given the differing etiologies of HCC in China versus Western countries, these results may not be globally generalizable. Last, this study includes only TKIs and ICIs that are currently widely used in clinical practice; the potential impact of newer adjuvant drugs on patient prognosis remains an area of interest. Therefore, this study should not be considered definitive.

In conclusion, our network meta-analysis indicates that, for HCC patients with high-risk recurrence factors, multiple adjuvant treatments such as ICIs, TKIs, RT, TACE, ICIs&TKIs, and TKIs&TACE can improve OS and RFS compared to surgery alone. For OS, ICIs&TKIs demonstrated superior efficacy to surgery alone and adjuvant HAIC. For RFS, TKIs&TACE significantly prolonged RFS compared to surgery alone and adjuvant HAIC.

## Supporting information

### S1 File. Search strategy.

(ZIP)

### S2 File. PRISMA (Preferred Reporting Items for Systematic Reviews and Meta-Analyses) flow diagram.

(ZIP)

### S3 File. Baseline characteristics.

(ZIP)

### S4 File. GRADE assessment of certainty of evidence in RCT studies.

(ZIP)

### S5 File. RoB 2 tool for Assessing risk of bias in RCT studies.

(ZIP)

### S6 File. ROBINS-I tool for assessing risk of bias in non-randomized studies.

(ZIP)

### S7 File. Trace and density plot of different interventions (OS). TACE, transhepatic arterial chemoembolization; HAIC, hepatic artery infusion chemotherapy; RT, radiotherapy; ICIs, immune checkpoint inhibitors; TKIs, Tyrosine kinase inhibitors; ICIs&TKIs, ICIs combined with TKIs; TKIs&TACE, TKIs combined with TACE.

(ZIP)

### S8 File. Trace and density plot of different interventions (RFS). TACE, transhepatic arterial chemoembolization; HAIC, hepatic artery infusion chemotherapy; RT, radiotherapy; ICIs, immune checkpoint inhibitors; TKIs, Tyrosine kinase inhibitors; ICIs&TKIs, ICIs combined with TKIs; TKIs&TACE, TKIs combined with TACE.

(ZIP)

**S9 File. Brooks-Gelman-Rubin diagnosis plot diagram of different interventions (OS).** TACE, transhepatic arterial chemoembolization; HAIC, hepatic artery infusion chemotherapy; RT, radiotherapy; ICIs, immune checkpoint inhibitors; TKIs, Tyrosine kinase inhibitors; ICIs&TKIs, ICIs combined with TKIs; TKIs&TACE, TKIs combined with TACE. (ZIP)

**S10 File. Brooks-Gelman-Rubin diagnosis plot diagram of different interventions (RFS).** TACE, transhepatic arterial chemoembolization; HAIC, hepatic artery infusion chemotherapy; RT, radiotherapy; ICIs, immune checkpoint inhibitors; TKIs, Tyrosine kinase inhibitors; ICIs&TKIs, ICIs combined with TKIs; TKIs&TACE, TKIs combined with TACE. (ZIP)

**S11 File. Heterogeneity test of different interventions (OS).** TACE, transhepatic arterial chemoembolization; HAIC, hepatic artery infusion chemotherapy; RT, radiotherapy; ICIs, immune checkpoint inhibitors; TKIs, Tyrosine kinase inhibitors; ICIs&TKIs, ICIs combined with TKIs; TKIs&TACE, TKIs combined with TACE. (ZIP)

**S12 File. Heterogeneity test of different interventions (RFS).** TACE, transhepatic arterial chemoembolization; HAIC, hepatic artery infusion chemotherapy; RT, radiotherapy; ICIs, immune checkpoint inhibitors; TKIs, Tyrosine kinase inhibitors; ICIs&TKIs, ICIs combined with TKIs; TKIs&TACE, TKIs combined with TACE. (ZIP)

**S13 File. Consistency test of different interventions (OS).** TACE, transhepatic arterial chemoembolization; RT, radiotherapy. (ZIP)

**S14 File. Consistency test of different interventions (RFS).** TACE, transhepatic arterial chemoembolization; RT, radiotherapy; TKIs, Tyrosine kinase inhibitors; TKIs&TACE, TKIs combined with TACE. (ZIP)

**S15 File. Funnel plot for the efficacy of adjuvant treatments on contributing OS (A) and preventing recurrence (B).** (ZIP)

**S16 File. Prisma statements 2020.** (ZIP)

**S1 Data. The raw data of this study.** (ZIP)

**S2 Data. The included and excluded articles of this study.** (ZIP)

## Acknowledgments

We would like to thank all authors of studies included in this systematic review and meta-analysis.

## Author contributions

**Conceptualization:** Leigu Shen, Hai Huang.

**Data curation:** Zha Peng, Leigu Shen, Yaqiong Wang, Boyu Chen.

**Formal analysis:** Zha Peng.



**Methodology:** Leigu Shen, Zhuangrong Zhu, Chengyi He.

**Software:** Zhuangrong Zhu, Chengyi He.

**Validation:** Leigu Shen.

**Visualization:** Leigu Shen.

**Writing – original draft:** Zha Peng, Yaqiong Wang.

**Writing – review & editing:** Leigu Shen, Yaqiong Wang, Hai Huang.

## References

1. Brown ZJ, Tsilimigras DI, Ruff SM, Mohseni A, Kamel IR, Cloyd JM, et al. Management of hepatocellular carcinoma: a review. *JAMA Surg.* 2023;158(4):410–20. <https://doi.org/10.1001/jamasurg.2022.7989> PMID: [36790767](https://pubmed.ncbi.nlm.nih.gov/36790767/)
2. Bai T, Tang Z-H, Wang X-B, Chen J, Ye J-Z, Lu S-L, et al. Radiotherapy is superior to transarterial chemoembolization as adjuvant therapy after narrow-margin hepatectomy in patients with hepatocellular carcinoma: a single-center prospective randomized study. *Langenbecks Arch Surg.* 2024;409(1):97. <https://doi.org/10.1007/s00423-024-03249-4> PMID: [38488934](https://pubmed.ncbi.nlm.nih.gov/38488934/)
3. Torimura T, Iwamoto H. Treatment and the prognosis of hepatocellular carcinoma in Asia. *Liver Int.* 2022;42(9):2042–54. <https://doi.org/10.1111/liv.15130> PMID: [34894051](https://pubmed.ncbi.nlm.nih.gov/34894051/)
4. Goh BKP, Chua DW, Koh Y-X, Tan E-K, Kam J-H, Teo J-Y, et al. Continuous improvements in short and long-term outcomes after partial hepatectomy for hepatocellular carcinoma in the 21st century: Single institution experience with 1300 resections over 18 years. *Surg Oncol.* 2021;38:101609. <https://doi.org/10.1016/j.suronc.2021.101609> PMID: [34126522](https://pubmed.ncbi.nlm.nih.gov/34126522/)
5. Chen Z-H, Zhang X-P, Feng J-K, Li L-Q, Zhang F, Hu Y-R, et al. Actual long-term survival in hepatocellular carcinoma patients with microvascular invasion: a multicenter study from China. *Hepatol Int.* 2021;15(3):642–50. <https://doi.org/10.1007/s12072-021-10174-x> PMID: [33821401](https://pubmed.ncbi.nlm.nih.gov/33821401/)
6. Shinkawa H, Tanaka S, Takemura S, Amano R, Kimura K, Kinoshita M, et al. Nomograms predicting extra- and early intrahepatic recurrence after hepatic resection of hepatocellular carcinoma. *Surgery.* 2021;169(4):922–8. <https://doi.org/10.1016/j.surg.2020.10.012> PMID: [33190917](https://pubmed.ncbi.nlm.nih.gov/33190917/)
7. Chen Z-H, Zhang X-P, Lu Y-G, Li L-Q, Chen M-S, Wen T-F, et al. Actual long-term survival in HCC patients with portal vein tumor thrombus after liver resection: a nationwide study. *Hepatol Int.* 2020;14(5):754–64. <https://doi.org/10.1007/s12072-020-10032-2> PMID: [32253678](https://pubmed.ncbi.nlm.nih.gov/32253678/)
8. Orimo T, Kamiyama T, Kakisaka T, Nagatsu A, Asahi Y, Aiyama T, et al. Hepatectomy is beneficial in select patients with multiple hepatocellular carcinomas. *Ann Surg Oncol.* 2022;29(13):8436–45. <https://doi.org/10.1245/s10434-022-12495-z> PMID: [36100832](https://pubmed.ncbi.nlm.nih.gov/36100832/)
9. Xia T-Y, Zhou Z-H, Meng X-P, Zha J-H, Yu Q, Wang W-L, et al. Predicting microvascular invasion in hepatocellular carcinoma using CT-based radiomics model. *Radiology.* 2023;307(4):e222729. <https://doi.org/10.1148/radiol.222729> PMID: [37097141](https://pubmed.ncbi.nlm.nih.gov/37097141/)
10. Long L, Chen B, Wang H, Zhao Y, Wu F, Wang L, et al. Survival benefit of radiotherapy following narrow-margin hepatectomy in patients with hepatocellular carcinoma: a propensity score-matched analysis based on phase II study. *Radiother Oncol.* 2023;180:109462. <https://doi.org/10.1016/j.radonc.2022.109462> PMID: [36634853](https://pubmed.ncbi.nlm.nih.gov/36634853/)
11. Li S-H, Mei J, Cheng Y, Li Q, Wang Q-X, Fang C-K, et al. Postoperative adjuvant hepatic arterial infusion chemotherapy with FOLFOX in hepatocellular carcinoma with microvascular invasion: a multicenter, phase III, randomized study. *J Clin Oncol.* 2023;41(10):1898–908. <https://doi.org/10.1200/JCO.22.01142> PMID: [36525610](https://pubmed.ncbi.nlm.nih.gov/36525610/)
12. Li L, Wu P-S, Liang X-M, Chen K, Zhang G-L, Su Q-B, et al. Adjuvant immune checkpoint inhibitors associated with higher recurrence-free survival in postoperative hepatocellular carcinoma (PREVENT): a prospective, multicentric cohort study. *J Gastroenterol.* 2023;58(10):1043–54. <https://doi.org/10.1007/s00535-023-02018-2> PMID: [37452107](https://pubmed.ncbi.nlm.nih.gov/37452107/)
13. Qiu Y, Yang Y, Wang T, Shen S, Wang W. Efficacy of postoperative adjuvant transcatheter arterial chemoembolization in hepatocellular carcinoma patients with microscopic portal vein invasion. *Front Oncol.* 2022;12:831614. <https://doi.org/10.3389/fonc.2022.831614> PMID: [35795039](https://pubmed.ncbi.nlm.nih.gov/35795039/)
14. Feng X, Feng G-Y, Tao J, Ao Y-P, Wu X-H, Qi S-G, et al. Comparison of different adjuvant therapy regimen efficacies in patients with high risk of recurrence after radical resection of hepatocellular carcinoma. *J Cancer Res Clin Oncol.* 2023;149(12):10505–18. <https://doi.org/10.1007/s00432-023-04874-0> PMID: [37284841](https://pubmed.ncbi.nlm.nih.gov/37284841/)
15. Page MJ, McKenzie JE, Bossuyt PM, Boutron I, Hoffmann TC, Mulrow CD, et al. The PRISMA 2020 statement: an updated guideline for reporting systematic reviews. *Syst Rev.* 2021;10(1):89. <https://doi.org/10.1186/s13643-021-01626-4> PMID: [33781348](https://pubmed.ncbi.nlm.nih.gov/33781348/)
16. Jalalzadeh H, Groenen H, Buis DR, Dreissen YE, Goosen JH, Ijpmma FF, et al. Efficacy of different preoperative skin antiseptics on the incidence of surgical site infections: a systematic review, GRADE assessment, and network meta-analysis. *Lancet Microbe.* 2022;3(10):e762–71. [https://doi.org/10.1016/S2666-5247\(22\)00187-2](https://doi.org/10.1016/S2666-5247(22)00187-2) PMID: [35985350](https://pubmed.ncbi.nlm.nih.gov/35985350/)
17. Yang S, Lin H, Song J. Efficacy and safety of various primary treatment strategies for very early and early hepatocellular carcinoma: a network meta-analysis. *Cancer Cell Int.* 2021;21(1):681. <https://doi.org/10.1186/s12935-021-02365-1> PMID: [34923980](https://pubmed.ncbi.nlm.nih.gov/34923980/)
18. Wang K, Xiang Y-J, Yu H-M, Cheng Y-Q, Liu Z-H, Qin Y-Y, et al. Adjuvant sintilimab in resected high-risk hepatocellular carcinoma: a randomized, controlled, phase 2 trial. *Nat Med.* 2024;30(3):708–15. <https://doi.org/10.1038/s41591-023-02786-7> PMID: [38242982](https://pubmed.ncbi.nlm.nih.gov/38242982/)

19. Lu C-D, Jiang Y-B, Feng J-K, Wang L, Wei X-B, Zhou B, et al. Postoperative adjuvant aspirin for patients with hepatitis B virus-related hepatocellular carcinoma and portal vein tumor thrombus: an open-label, randomized controlled trial. *Heliyon*. 2023;9(9):e20015. <https://doi.org/10.1016/j.heliyon.2023.e20015> PMID: 37810112
20. Rong W, Yu W, Wang L, Wu F, Zhang K, Chen B, et al. Adjuvant radiotherapy in central hepatocellular carcinoma after narrow-margin hepatectomy: a 10-year real-world evidence. *Chin J Cancer Res*. 2020;32(5):645–53. <https://doi.org/10.21147/j.issn.1000-9604.2020.05.09> PMID: 33223759
21. Sun J, Yang L, Shi J, Liu C, Zhang X, Chai Z, et al. Postoperative adjuvant IMRT for patients with HCC and portal vein tumor thrombus: an open-label randomized controlled trial. *Radiother Oncol*. 2019;140:20–5. <https://doi.org/10.1016/j.radonc.2019.05.006> PMID: 31176205
22. Wei W, Jian P-E, Li S-H, Guo Z-X, Zhang Y-F, Ling Y-H, et al. Adjuvant transcatheter arterial chemoembolization after curative resection for hepatocellular carcinoma patients with solitary tumor and microvascular invasion: a randomized clinical trial of efficacy and safety. *Cancer Commun (Lond)*. 2018;38(1):61. <https://doi.org/10.1186/s40880-018-0331-y> PMID: 30305149
23. Wang Z, Ren Z, Chen Y, Hu J, Yang G, Yu L, et al. Adjuvant transarterial chemoembolization for HBV-related hepatocellular carcinoma after resection: a randomized controlled study. *Clin Cancer Res*. 2018;24(9):2074–81. <https://doi.org/10.1158/1078-0432.CCR-17-2899> PMID: 29420221
24. Zhong C, Guo R, Li J, Shi M, Wei W, Chen M, et al. A randomized controlled trial of hepatectomy with adjuvant transcatheter arterial chemoembolization versus hepatectomy alone for Stage III A hepatocellular carcinoma. *J Cancer Res Clin Oncol*. 2009;135(10):1437–45. <https://doi.org/10.1007/s00432-009-0588-2> PMID: 19408012
25. Peng B-G, He Q, Li J-P, Zhou F. Adjuvant transcatheter arterial chemoembolization improves efficacy of hepatectomy for patients with hepatocellular carcinoma and portal vein tumor thrombus. *Am J Surg*. 2009;198(3):313–8. <https://doi.org/10.1016/j.amjsurg.2008.09.026> PMID: 19285298
26. Peng Z, Fan W, Liu Z, Xiao H, Wu J, Tang R, et al. Adjuvant transarterial chemoembolization with sorafenib for portal vein tumor thrombus: a randomized clinical trial. *JAMA Surg*. 2024;159(6):616–24. <https://doi.org/10.1001/jamasurg.2024.0506> PMID: 38568599
27. Xiang C, Shen X, Zeng X, Zhang Y, Ma Z, Zhang G, et al. Effect of transarterial chemoembolization as postoperative adjuvant therapy for intermediate-stage hepatocellular carcinoma with microvascular invasion: a multicenter cohort study. *Int J Surg*. 2024;110(1):315–23. <https://doi.org/10.1097/JS9.0000000000000805> PMID: 37812183
28. Wang L, Wang W, Rong W, Li Z, Wu F, Liu Y, et al. Postoperative adjuvant treatment strategy for hepatocellular carcinoma with microvascular invasion: a non-randomized interventional clinical study. *BMC Cancer*. 2020;20(1):614. <https://doi.org/10.1186/s12885-020-07087-7> PMID: 32611327
29. Qi Y-P, Zhong J-H, Liang Z-Y, Zhang J, Chen B, Chen C-Z, et al. Adjuvant transarterial chemoembolization for patients with hepatocellular carcinoma involving microvascular invasion. *Am J Surg*. 2019;217(4):739–44. <https://doi.org/10.1016/j.amjsurg.2018.07.054> PMID: 30103903
30. Hsiao J-H, Tsai C-C, Liang T-J, Chiang C-L, Liang H-L, Chen I-S, et al. Adjuvant hepatic arterial infusion chemotherapy is beneficial for selective patients with hepatocellular carcinoma undergoing surgical treatment. *Int J Surg*. 2017;45:35–41. <https://doi.org/10.1016/j.ijsu.2017.07.071> PMID: 28728985
31. Xia F, Wu L-L, Lau W-Y, Huan H-B, Wen X-D, Ma K-S, et al. Adjuvant sorafenib after hepatectomy for barcelona clinic liver cancer-stage c hepatocellular carcinoma patients. *World J Gastroenterol*. 2016;22(23):5384–92. <https://doi.org/10.3748/wjg.v22.i23.5384> PMID: 27340354
32. Li J, Wang W-Q, Zhu R-H, Lv X, Wang J-L, Liang B-Y, et al. Postoperative adjuvant tyrosine kinase inhibitors combined with anti-PD-1 antibodies improves surgical outcomes for hepatocellular carcinoma with high-risk recurrent factors. *Front Immunol*. 2023;14:1202039. <https://doi.org/10.3389/fimmu.2023.1202039> PMID: 37359534
33. Bai S, Yang P, Liu J, Xue H, Xia Y, Liu F, et al. Surgical margin affects the long-term prognosis of patients with hepatocellular carcinoma undergoing radical hepatectomy followed by adjuvant TACE. *Oncologist*. 2023;28(8):e633–44. <https://doi.org/10.1093/oncolo/oyad088> PMID: 37029989
34. Lin K, Wei F, Huang Q, Lai Z, Zhang J, Chen Q, et al. Postoperative adjuvant transarterial chemoembolization plus tyrosine kinase inhibitor for hepatocellular carcinoma: a multicentre retrospective study. *J Hepatocell Carcinoma*. 2022;9:127–40. <https://doi.org/10.2147/JHC.S352480> PMID: 35300207
35. Gou X-X, Shi H-Y, Li C, Chen Z-L, Ouyang W, Sun L-Y, et al. Association of adjuvant radiation therapy with long-term overall and recurrence-free survival after hepatectomy for hepatocellular carcinoma: a multicenter propensity-matched study. *Int J Radiat Oncol Biol Phys*. 2022;114(2):238–49. <https://doi.org/10.1016/j.ijrobp.2022.05.020> PMID: 35643251
36. Wang L, Lin N, Lin K, Xiao C, Wang R, Chen J, et al. The clinical value of postoperative transarterial chemoembolization for resectable patients with intermediate hepatocellular carcinoma after radical hepatectomy: a propensity score-matching study. *J Gastrointest Surg*. 2021;25(5):1172–83. <https://doi.org/10.1007/s11605-020-04588-5> PMID: 32440804
37. Wang H, Yu H, Qian Y-W, Cao Z-Y, Wu M-C, Cong W-M. Postoperative adjuvant transcatheter arterial chemoembolization improves the prognosis of patients with huge hepatocellular carcinoma. *Hepatobiliary Pancreat Dis Int*. 2021;20(3):232–9. <https://doi.org/10.1016/j.hbpd.2020.12.018> PMID: 33455865
38. Li Q, Song T. Association between adjuvant sorafenib and the prognosis of patients with hepatocellular carcinoma at a high risk of recurrence after radical resection. *Front Oncol*. 2021;11:633033. <https://doi.org/10.3389/fonc.2021.633033> PMID: 34631511
39. Wang L, Ke Q, Lin K, Chen J, Wang R, Xiao C, et al. Not all hepatocellular carcinoma patients with microvascular invasion after R0 resection could be benefited from prophylactic transarterial chemoembolization: a propensity score matching study. *Cancer Manag Res*. 2020;12:3815–25. <https://doi.org/10.2147/CMAR.S251605> PMID: 32547217

40. Huang Q, Lin K, Wang L, Zeng J, Liu H, Ding Z, et al. Postoperative adjuvant transarterial chemoembolization improves short-term prognosis of hepatocellular carcinoma with bile duct tumor thrombus: a propensity-score matching study. *Cancer Manag Res*. 2020;12:9183–95. <https://doi.org/10.2147/CMAR.S270467> PMID: 33061610
41. Zhang X-P, Liu Y-C, Chen Z-H, Sun J-X, Wang K, Chai Z-T, et al. Postoperative adjuvant transarterial chemoembolization improves outcomes of hepatocellular carcinoma associated with hepatic vein invasion: a propensity score matching analysis. *Ann Surg Oncol*. 2019;26(5):1465–73. <https://doi.org/10.1245/s10434-019-07223-z> PMID: 30767178
42. Zhang X-P, Chai Z-T, Gao Y-Z, Chen Z-H, Wang K, Shi J, et al. Postoperative adjuvant sorafenib improves survival outcomes in hepatocellular carcinoma patients with microvascular invasion after R0 liver resection: a propensity score matching analysis. *HPB (Oxford)*. 2019;21(12):1687–96. <https://doi.org/10.1016/j.hpb.2019.04.014> PMID: 31153833
43. Wang Y-Y, Wang L-J, Xu D, Liu M, Wang H-W, Wang K, et al. Postoperative adjuvant transcatheter arterial chemoembolization should be considered selectively in patients who have hepatocellular carcinoma with microvascular invasion. *HPB (Oxford)*. 2019;21(4):425–33. <https://doi.org/10.1016/j.hpb.2018.08.001> PMID: 30249510
44. Wang L, Chen B, Li Z, Yao X, Liu M, Rong W, et al. Optimal postoperative adjuvant treatment strategy for HBV-related hepatocellular carcinoma with microvascular invasion: a propensity score analysis. *Onco Targets Ther*. 2019;12:1237–47. <https://doi.org/10.2147/OTT.S179247> PMID: 30863091
45. Li C, Wen T-F, Yan L-N, Lu W-S, Li B, Wang W-T, et al. Liver resection versus liver resection plus TACE for patients with hepatocellular carcinoma beyond Milan criteria. *J Surg Res*. 2017;209:8–16. <https://doi.org/10.1016/j.jss.2016.09.054> PMID: 28032575
46. Li F, Guo Z, Zhang Y, Wang H, Zhang X, Si T, et al. Postoperative adjuvant arterial chemoembolization improves the survival of hepatitis B virus-related hepatocellular carcinoma: a retrospective control study. *Ir J Med Sci*. 2015;184(4):753–9. <https://doi.org/10.1007/s11845-014-1164-6> PMID: 24972992
47. Luo L, Shan R, Cui L, Wu Z, Qian J, Tu S, et al. Postoperative adjuvant transarterial chemoembolisation improves survival of hepatocellular carcinoma patients with microvascular invasion: A multicenter retrospective cohort. *United Eur Gastroenterol J*. 2023;11(2):228–41. <https://doi.org/10.1002/ueg2.12365> PMID: 36905230
48. Llovet JM, Pinyol R, Yarchoan M, Singal AG, Marron TU, Schwartz M, et al. Adjuvant and neoadjuvant immunotherapies in hepatocellular carcinoma. *Nat Rev Clin Oncol*. 2024;21(4):294–311. <https://doi.org/10.1038/s41571-024-00868-0> PMID: 38424197
49. Zhang W, Tong S, Hu B, Wan T, Tang H, Zhao F, et al. Lenvatinib plus anti-PD-1 antibodies as conversion therapy for patients with unresectable intermediate-advanced hepatocellular carcinoma: a single-arm, phase II trial. *J Immunother Cancer*. 2023;11(9):e007366. <https://doi.org/10.1136/jitc-2023-007366> PMID: 37730273
50. Peng Z, Fan W, Zhu B, Wang G, Sun J, Xiao C, et al. Lenvatinib combined with transarterial chemoembolization as first-line treatment for advanced hepatocellular carcinoma: a Phase III, Randomized Clinical Trial (LAUNCH). *J Clin Oncol*. 2023;41(1):117–27. <https://doi.org/10.1200/JCO.22.00392> PMID: 35921605
51. Liang L, Xu Z-D, Lu W-F, Du C-F, Gao Z-Y, Huang X-K, et al. Survival benefit from adjuvant TACE combined with lenvatinib for patients with hepatocellular carcinoma and microvascular invasion after curative hepatectomy. *Asian J Surg*. 2024;47(12):5106–12. <https://doi.org/10.1016/j.asjsur.2024.04.157> PMID: 38724372
52. Ma T, Bai X, Zhang Q, Chen W, Huang K, Qian T, et al. Adjuvant transarterial chemoembolization for hepatocellular carcinoma following curative resection: a randomized, open-label, phase 3 trial. *Hepatology*. 2025;82(5):1112–21. <https://doi.org/10.1097/HEP.0000000000001233> PMID: 39808820
53. Huang J-X, Zhang W-H, Wu Y-M, Hu J-Y, Long H, Zhu H-D, et al. A study on overcoming post-TACE drug resistance in HCC based on controllable oxygen release-magnetic hyperthermia therapy. *Adv Healthc Mater*. 2024;13(32):e2402253. <https://doi.org/10.1002/adhm.202402253> PMID: 39319494
54. Pillai K, Ke K, Mekawy A, Akhter J, Morris DL. Enhancement of treatment efficacy of hepatic tumours using Trans-arterial-chemoembolization. *Am J Cancer Res*. 2023;13(5):1623–39. PMID: 37293148
55. Liu W-R, Tian M-X, Tao C-Y, Tang Z, Zhou Y-F, Song S-S, et al. Adjuvant Transarterial chemoembolization does not influence recurrence-free or overall survival in patients with combined hepatocellular carcinoma and Cholangiocarcinoma after curative resection: a propensity score matching analysis. *BMC Cancer*. 2020;20(1):642. <https://doi.org/10.1186/s12885-020-07138-z> PMID: 32650743
56. Chen ZH, Zhang XP, Zhou TF, Wang K, Wang H, Chai ZT, et al. Adjuvant transarterial chemoembolization improves survival outcomes in hepatocellular carcinoma with microvascular invasion: A systematic review and meta-analysis. *Eur J Surg Oncol* 2019, 45(11):2188–96.
57. Zeng G, Zou B, Li Y, Lin E, Liu X, Li P, et al. Efficacy of adjuvant transarterial chemoembolization after radical hepatectomy in solitary hepatocellular carcinoma patients: a retrospective study. *J Invest Surg*. 2022;35(6):1208–16. <https://doi.org/10.1080/08941939.2021.2021334> PMID: 35078386
58. Chen W, Chiang C-L, Dawson LA. Efficacy and safety of radiotherapy for primary liver cancer. *Chin Clin Oncol*. 2021;10(1):9. <https://doi.org/10.21037/cco-20-89> PMID: 32576017
59. Yang Y, Xiong L, Li M, Jiang P, Wang J, Li C. Advances in radiotherapy and immunity in hepatocellular carcinoma. *J Transl Med*. 2023;21(1):526. <https://doi.org/10.1186/s12967-023-04386-y> PMID: 37542324

60. Lin W, Xu Y, Chen X, Liu J, Weng Y, Zhuang Q, et al. Radiation-induced small extracellular vesicles as "carriages" promote tumor antigen release and trigger antitumor immunity. *Theranostics*. 2020;10(11):4871–84. <https://doi.org/10.7150/thno.43539> PMID: 32308755
61. Berg TJ, Pietras A. Radiotherapy-induced remodeling of the tumor microenvironment by stromal cells. *Semin Cancer Biol*. 2022;86(Pt 3):846–56. <https://doi.org/10.1016/j.semcancer.2022.02.011> PMID: 35143991
62. Lewis S, Dawson L, Barry A, Stanescu T, Mohamad I, Hosni A. Stereotactic body radiation therapy for hepatocellular carcinoma: from infancy to ongoing maturity. *JHEP Rep*. 2022;4(8):100498. <https://doi.org/10.1016/j.jhepr.2022.100498> PMID: 35860434
63. Wang W-H, Wang Z, Wu J-X, Zhang T, Rong W-Q, Wang L-M, et al. Survival benefit with IMRT following narrow-margin hepatectomy in patients with hepatocellular carcinoma close to major vessels. *Liver Int*. 2015;35(12):2603–10. <https://doi.org/10.1111/liv.12857> PMID: 25939444
64. Rim CH, Cheng J, Huang W-Y, Kimura T, Lee V, Zeng Z-C, et al. An evaluation of hepatocellular carcinoma practice guidelines from a radiation oncology perspective. *Radiother Oncol*. 2020;148:73–81. <https://doi.org/10.1016/j.radonc.2020.03.027> PMID: 32335365
65. Munoz-Schuffenegger P, Barry A, Atenafu EG, Kim J, Brierley J, Ringash J, et al. Stereotactic body radiation therapy for hepatocellular carcinoma with Macrovascular invasion. *Radiother Oncol*. 2021;156:120–6. <https://doi.org/10.1016/j.radonc.2020.11.033> PMID: 33285195
66. da Fonseca LG, Reig M, Bruix J. Tyrosine kinase inhibitors and hepatocellular carcinoma. *Clin Liver Dis*. 2020;24(4):719–37.
67. Llovet JM, Ricci S, Mazzaferro V, Hilgard P, Gane E, Blanc J-F, et al. Sorafenib in advanced hepatocellular carcinoma. *N Engl J Med*. 2008;359(4):378–90. <https://doi.org/10.1056/NEJMoa0708857> PMID: 18650514
68. Kudo M, Finn RS, Qin S, Han K-H, Ikeda K, Piscaglia F, et al. Lenvatinib versus sorafenib in first-line treatment of patients with unresectable hepatocellular carcinoma: a randomised phase 3 non-inferiority trial. *Lancet*. 2018;391(10126):1163–73. [https://doi.org/10.1016/S0140-6736\(18\)30207-1](https://doi.org/10.1016/S0140-6736(18)30207-1) PMID: 29433850
69. Wang D, Jia W, Wang Z, Wen T, Ding W, Xia F, et al. Retrospective analysis of sorafenib efficacy and safety in Chinese patients with high recurrence rate of post-hepatic carcinectomy. *Onco Targets Ther*. 2019;12:5779–91. <https://doi.org/10.2147/OTT.S168447> PMID: 31410023
70. Bruix J, Takayama T, Mazzaferro V, Chau G-Y, Yang J, Kudo M, et al. Adjuvant sorafenib for hepatocellular carcinoma after resection or ablation (STORM): a phase 3, randomised, double-blind, placebo-controlled trial. *Lancet Oncol*. 2015;16(13):1344–54. [https://doi.org/10.1016/S1470-2045\(15\)00198-9](https://doi.org/10.1016/S1470-2045(15)00198-9) PMID: 26361969
71. Dikilitas M. Why Adjuvant and neoadjuvant therapy failed in HCC. Can the new immunotherapy be expected to be better? *J Gastrointest Cancer*. 2020;51(4):1193–6. <https://doi.org/10.1007/s12029-020-00497-7> PMID: 32869146
72. Pinato DJ, Fessas P, Sapisochin G, Marron TU. Perspectives on the neoadjuvant use of immunotherapy in hepatocellular carcinoma. *Hepatology*. 2021;74(1):483–90. <https://doi.org/10.1002/hep.31697> PMID: 33369758
73. Zhang W, Ouyang D, Huang Z, Che X. Hepatic arterial infusion chemotherapy versus sorafenib for advanced hepatocellular carcinoma with portal vein tumor thrombus: an updated meta-analysis and systematic review. *Front Oncol*. 2023;13:1085166. <https://doi.org/10.3389/fonc.2023.1085166> PMID: 36776344
74. Zhao M, Guo Z, Zou Y-H, Li X, Yan Z-P, Chen M-S, et al. Arterial chemotherapy for hepatocellular carcinoma in China: consensus recommendations. *Hepatol Int*. 2024;18(1):4–31. <https://doi.org/10.1007/s12072-023-10599-6> PMID: 37864725
75. Hatano E, Uemoto S, Yamaue H, Yamamoto M, Japanese Society of Hepato-Biliary-Pancreatic Surgery. Significance of hepatic resection and adjuvant hepatic arterial infusion chemotherapy for hepatocellular carcinoma with portal vein tumor thrombus in the first branch of portal vein and the main portal trunk: a project study for hepatic surgery of the Japanese Society of Hepato-Biliary-Pancreatic Surgery. *J Hepatobiliary Pancreat Sci*. 2018;25(9):395–402. <https://doi.org/10.1002/jhbp.574> PMID: 30091239
76. Moran A, Ramos LF, Picado O, Pendola F, Sleeman D, Dudeja V, et al. Hepatocellular carcinoma: resection with adjuvant hepatic artery infusion therapy vs resection alone. A systematic review and meta-analysis. *J Surg Oncol*. 2019;119(4):455–63. <https://doi.org/10.1002/jso.25338> PMID: 30575028
77. Li Q-J, He M-K, Chen H-W, Fang W-Q, Zhou Y-M, Xu L, et al. Hepatic arterial infusion of oxaliplatin, fluorouracil, and leucovorin versus transarterial chemoembolization for large hepatocellular carcinoma: a randomized phase III trial. *J Clin Oncol*. 2022;40(2):150–60. <https://doi.org/10.1200/JCO.21.00608> PMID: 34648352
